# Supplementary material for: Ride-Sharing the Wealth: Effects of Uber and Lyft on Jobs, Wages and Economic Growth
Source: Research Square preprint supplement (doi:10.21203/rs.3.rs-6822138/v1), 2025-06-09
Supplement: Supplementary file 1 [file b9a15a3ce96045a001722a9c.pdf]

# **Ride-Sharing the Wealth – Effects of Uber and Lyft on Jobs, Wages and Economic Growth**

## **SUPPLEMENTARY INFORMATION (SI)**

### **Adam Koling**

Saïd Business School  
University of Oxford, Oxford, United Kingdom, OX1 1HP  
Email: adam.koling@sbs.ox.ac.uk  
Corresponding Author

### **Daniel Armanios**

Saïd Business School  
University of Oxford, Oxford, United Kingdom, OX1 1HP  
Email: daniel.armanios@sbs.ox.ac.uk

### **Jeremy Michalek**

Department of Engineering and Public Policy  
Department of Mechanical Engineering  
Department of Civil and Environmental Engineering  
Carnegie Mellon University, Pittsburgh, Pennsylvania, 15213  
Email: jmichalek@cmu.edu

### **Connor Forsythe**

Department of Mechanical Engineering  
Carnegie Mellon University, Pittsburgh, Pennsylvania, 15213  
Email: connorforsythe@cmu.edu

### **Akshaya Jha**

Heinz College of Information Systems and Public Policy  
Carnegie Mellon University, Pittsburgh, Pennsylvania, 15213  
Email: akshayaj@andrew.cmu.edu

## Contents

|           |                                                                                  |           |
|-----------|----------------------------------------------------------------------------------|-----------|
| <b>1</b>  | <b>TNC Regions</b>                                                               | <b>3</b>  |
| <b>2</b>  | <b>Dataset</b>                                                                   | <b>4</b>  |
| <b>3</b>  | <b>Public Statements by Uber and Lyft Leadership</b>                             | <b>4</b>  |
| 3.1       | Uber and Lyft claims about overall employment, wages, and GDP . . . . .          | 4         |
| 3.2       | Uber and Lyft claims about employment and wages in unstable jobs or industries . | 5         |
| <b>4</b>  | <b>Qualitative Rationale for Alternative (Non-TWFE) Estimators</b>               | <b>6</b>  |
| <b>5</b>  | <b>Goodman-Bacon Diagnostic</b>                                                  | <b>8</b>  |
| <b>6</b>  | <b>Aggregating Group-Time Average Treatment Effects (Cohort, Dynamic)</b>        | <b>8</b>  |
| <b>7</b>  | <b>Additional Estimators (Sun and Abraham, Stacked Regression)</b>               | <b>10</b> |
| <b>8</b>  | <b>Event Studies for Additional Estimators</b>                                   | <b>10</b> |
| <b>9</b>  | <b>Data Availability and Extended Event Studies</b>                              | <b>16</b> |
| <b>10</b> | <b>Identification Assumptions</b>                                                | <b>16</b> |
| 10.1      | Callaway & Sant’Anna Assumptions . . . . .                                       | 17        |
| 10.2      | Correlated entry of other gig economy platforms . . . . .                        | 17        |

## TNC REGIONS

Table 1 lists each TNC region together with its associated metropolitan or micropolitan statistical area name.

**TABLE 1: Corresponding TNC Regions and Metropolitan/Micropolitan Statistical Areas**

| TNC Region         | MSA Name                                    | TNC Region (Continued) | MSA Name (Continued)                           |
|--------------------|---------------------------------------------|------------------------|------------------------------------------------|
| Abilene            | Abilene, TX                                 | Los Angeles            | Los Angeles-Long Beach-Santa Ana, CA           |
| Akron              | Akron, OH                                   | Louisville             | Louisville/Jefferson County, KY-IN             |
| Albuquerque        | Albuquerque, NM                             | Lubbock                | Lubbock, TX                                    |
| Lehigh Valley      | Allentown-Bethlehem-Easton, PA-NJ           | Macon                  | Macon, GA                                      |
| Amarillo           | Amarillo, TX                                | Mankato                | Mankato-North Mankato, MN                      |
| Ann Arbor          | Ann Arbor, MI                               | Rio Grande Valley      | McAllen-Edinburg-Mission, TX                   |
| Asheville, NC      | Asheville, NC                               | Southern Oregon        | Medford, OR                                    |
| Athens             | Athens-Clarke County, GA                    | Memphis                | Memphis, TN-MS-AR                              |
| Atlanta            | Atlanta-Sandy Springs-Marietta, GA          | Miami                  | Miami-Fort Lauderdale-Pompano Beach, FL        |
| Augusta            | Augusta-Richmond County, GA-SC              | NW Indiana             | Michigan City-La Porte, IN                     |
| Austin             | Austin-Round Rock-San Marcos, TX            | Midland-Odessa         | Midland, TX                                    |
| Bakersfield        | Bakersfield-Delano, CA                      | Milwaukee              | Milwaukee-Waukesha-West Allis, WI              |
| Baltimore-Maryland | Baltimore-Towson, MD                        | Minneapolis - St. Paul | Minneapolis-St. Paul-Bloomington, MN-WI        |
| Baton Rouge        | Baton Rouge, LA                             | Missoula               | Missoula, MT                                   |
| Bellingham         | Bellingham, WA                              | Modesto                | Modesto, CA                                    |
| Central Oregon     | Bend, OR                                    | Eastern WV             | Morgantown, WV                                 |
| Billings           | Billings, MT                                | Nacogdoches            | Nacogdoches, TX                                |
| Bismarck           | Bismarck, ND                                | Nashville              | Nashville-Davidson-Murfreesboro-Franklin, TN   |
| Boise              | Boise City-Nampa, ID                        | New Orleans            | New Orleans-Metairie-Kenner, LA                |
| Boone              | Boone, NC                                   | New York City          | York-Northern New Jersey-Long Island, NY-NJ-PA |
| Bozeman            | Bozeman, MT                                 | Sarasota               | North Port-Bradenton-Sarasota, FL              |
| Coastal Georgia    | Brunswick, GA                               | Ocala, FL              | Ocala, FL                                      |
| Fort Myers-Naples  | Cape Coral-Fort Myers, FL                   | Oklahoma City          | Oklahoma City, OK                              |
| Cedar Rapids       | Cedar Rapids, IA                            | Olympia                | Olympia, WA                                    |
| Champaign          | Champaign-Urbana, IL                        | Omaha                  | Omaha-Council Bluffs, NE-IA                    |
| Charleston, SC     | Charleston-North Charleston-Summerville, SC | Orlando                | Orlando-Kissimmee-Sanford, FL                  |
| Chattanooga        | Chattanooga, TN-GA                          | Ventura                | Oxnard-Thousand Oaks-Ventura, CA               |
| Chicago            | Chicago-Joliet-Naperville, IL-IN-WI         | Pensacola, FL          | Pensacola-Ferry Pass-Brent, FL                 |
| Cincinnati         | Cincinnati-Middletown, OH-KY-IN             | Peoria, IL             | Peoria, IL                                     |
| Cleveland          | Cleveland-Elyria-Mentor, OH                 | Philadelphia           | Philadelphia-Camden-Wilmington, PA-NJ-DE-MD    |
| Coeur d'Alene      | Coeur d'Alene, ID                           | Pierre                 | Pierre, SD                                     |
| College Station    | College Station-Bryan, TX                   | Pittsburgh             | Pittsburgh, PA                                 |
| Colorado Springs   | Colorado Springs, CO                        | Portland, ME           | Portland-South Portland-Biddeford, ME          |
| Columbia, SC       | Columbia, SC                                | Portland               | Portland-Vancouver-Hillsboro, OR-WA            |
| Columbus, GA       | Columbus, GA-AL                             | Raleigh-Durham         | Raleigh-Cary, NC                               |
| Columbus           | Columbus, OH                                | Rapid City             | Rapid City, SD                                 |
| Corpus Christi     | Corpus Christi, TX                          | Reading, PA            | Reading, PA                                    |
| Dallas-Fort Worth  | Dallas-Fort Worth-Arlington, TX             | Reno                   | Reno-Sparks, NV                                |
| Quad Cities        | Davenport-Moline-Rock Island, IA-IL         | Richmond               | Richmond, VA                                   |
| Denver             | Denver-Aurora-Broomfield, CO                | Inland Empire          | Riverside-San Bernardino-Ontario, CA           |
| Des Moines         | Des Moines-West Des Moines, IA              | Roanoke-Blacksburg     | Roanoke, VA                                    |
| Detroit            | Detroit-Warren-Livonia, MI                  | Rochester, MN          | Rochester, MN                                  |
| Dickinson          | Dickinson, ND                               | Rockford               | Rockford, IL                                   |
| DuBois             | DuBois, PA                                  | Roswell                | Roswell, NM                                    |
| Dubuque            | Dubuque, IA                                 | Sacramento             | Sacramento-Arden-Arcade-Roseville, CA          |
| Duluth             | Duluth, MN-WI                               | Tri-Cities, MI         | Saginaw-Saginaw Township North, MI             |
| Eagle Pass         | Eagle Pass, TX                              | St Cloud               | St. Cloud, MN                                  |
| Eau Claire         | Eau Claire, WI                              | Southern Utah          | St. George, UT                                 |
| El Paso            | El Paso, TX                                 | St Louis               | St. Louis, MO-IL                               |
| Erie               | Erie, PA                                    | Willamette Valley      | Salem, OR                                      |
| Eugene, OR         | Eugene-Springfield, OR                      | Salt Lake City         | Salt Lake City, UT                             |
| Fargo - Moorhead   | Fargo, ND-MN                                | San Angelo             | San Angelo, TX                                 |
| Flint              | Flint, MI                                   | San Antonio            | San Antonio-New Braunfels, TX                  |
| Florence, SC       | Florence, SC                                | San Diego              | San Diego-Carlsbad-San Marcos, CA              |
| Fort Collins       | Fort Collins-Loveland, CO                   | San Francisco Bay Area | San Francisco-Oakland-Fremont, CA              |
| Fort Wayne         | Fort Wayne, IN                              | San Luis Obispo        | San Luis Obispo-Paso Robles, CA                |
| Fresno             | Fresno, CA                                  | Santa Fe               | Santa Fe, NM                                   |
| Gallup             | Gallup, NM                                  | Savannah-Hilton Head   | Savannah, GA                                   |
| Grand Forks        | Grand Forks, ND-MN                          | Wilkes-Barre Scranton  | Scranton-Wilkes-Barre, PA                      |
| Green Bay          | Green Bay, WI                               | Seattle                | Seattle-Tacoma-Bellevue, WA                    |
| Piedmont Triad     | Greensboro-High Point, NC                   | Sioux Falls            | Sioux Falls, SD                                |
| Harrisburg         | Harrisburg-Carlisle, PA                     | South Bend             | South Bend-Mishawaka, IN-MI                    |
| Big Island         | Hilo, HI                                    | Springfield, IL        | Springfield, IL                                |
| Houston            | Houston-Sugar Land-Baytown, TX              | Springfield, Mo        | Springfield, MO                                |
| Indianapolis       | Indianapolis-Carmel, IN                     | State College          | State College, PA                              |
| Iowa City          | Iowa City, IA                               | Stillwater             | Stillwater, OK                                 |
| Jacksonville       | Jacksonville, FL                            | Tallahassee            | Tallahassee, FL                                |
| Johnstown-Altoona  | Johnstown, PA                               | Tampa Bay              | Tampa-St. Petersburg-Clearwater, FL            |
| Maui               | Kahului-Wailuku, HI                         | Taos                   | Taos, NM                                       |
| Kansas City        | Kansas City, MO-KS                          | Texarkana              | Texarkana, TX-Texarkana, AR                    |
| Kauai              | Kapaa, HI                                   | Topeka                 | Topeka, KS                                     |
| Florida Keys       | Key West, FL                                | Traverse City          | Traverse City, MI                              |
| Outer Banks, NC    | Kill Devil Hills, NC                        | Tulsa                  | Tulsa, OK                                      |
| Killeen            | Killeen-Temple-Fort Hood, TX                | Tyler                  | Tyler, TX                                      |
| Tri-Cities         | Kingsport-Bristol-Bristol, TN-VA            | Honolulu               | Urban Honolulu, HI                             |
| La Crosse          | La Crosse, WI-MN                            | Hampton Roads          | Virginia Beach-Norfolk-Newport News, VA-NC     |
| Lancaster, PA      | Lancaster, PA                               | Washington D.C.        | Washington-Arlington-Alexandria, DC-VA-MD-WV   |
| Laredo             | Laredo, TX                                  | Waterloo-Cedar Falls   | Waterloo-Cedar Falls, IA                       |
| Las Cruces         | Las Cruces, NM                              | Wichita                | Wichita, KS                                    |
| Las Vegas          | Las Vegas-Paradise, NV                      | Wichita Falls          | Wichita Falls, TX                              |
| Lawrence           | Lawrence, KS                                | Greater Williamsport   | Williamsport, PA                               |
| Lawton             | Lawton, OK                                  | Eastern Washington     | Yakima, WA                                     |
| Lincoln            | Lincoln, NE                                 | York-Gettysburg        | York-Hanover, PA                               |
|                    |                                             | Youngstown             | Youngstown-Warren-Boardman, OH-PA              |

## DATASET

The included CSV comprises a single comprehensive panel dataset underlying all quantitative analysis. The spreadsheet contains all independent, dependent, and normalization variables for 2010 to 2019, inclusive, across the 167 non-overlapping metropolitan statistical areas in our study, each corresponding to a distinct TNC coverage region. These two sets of geographic units were aligned and manually matched with one another according to which pairs most nearly shared centroids and perimeters during the decade under investigation. Spatial matches between most metropolitan areas and their TNC region counterparts are largely self-explanatory based on common names or descriptions. For clarity, all are listed side-by-side, using 2021 service area names, in **Table 1**.

## PUBLIC STATEMENTS BY UBER AND LYFT LEADERSHIP

We summarize public statements made by Uber and Lyft leadership first on claims about overall employment, wages and GDP and second on claims about employment and wages in unstable jobs or industries.

### Uber and Lyft claims about overall employment, wages, and GDP

The following quotes, cited in chronological order, inform three of our five research questions and hypotheses. *What were the overall economic effects of Uber and Lyft entry in United States cities, specifically on the outcome variables of citywide employment, wages, and metropolitan area GDP?*

“In California alone, Lyft injected \$150 million into the economy through people...spending money locally...and creating jobs.”

- Logan Green, Chief Executive Officer, Lyft. Remarks at Startup Grind conference, Madrid, Feb 13, 2015.

“Let’s talk about the U.S. specifically. There are not enough people who can reach the income they desire. Wage growth has been fairly anemic. [Uber] is helping push some people into the middle class and provide some security.”

- David Plouffe, Chief Advisor and Board Member, Uber. Remarks at United Nations Job Summit, San Francisco, June 29, 2015.

“Uber allows you to go to job interviews, work on skills, and build your network...now, that’s in the U.S. economy, where the primary issue we face today is underemployment and wage stagnation...The positive economic benefits are not just on [the] driver side. Ridesharing also has a powerful effect on cities, their economies and the people who live in them. Take small businesses, for example. With Uber, you no longer need to be in a particular neighborhood or on a particular street to get customers, and potential customers don’t need a car or a taxi.”

- David Plouffe, Chief Advisor and Board Member, Uber. Remarks at 1776 tech incubator conference, Washington, DC, November 3, 2015

"Lyft has become a powerful driver of economic growth in the Phoenix area by creating flexible economic opportunities for drivers, improved transportation access for passengers, and encouraging local spending.”

- Drena Kusari, Phoenix General Manager, Lyft. Statement to Phoenix Business Journal, December 12, 2016.

1  
2 “Our riders...represent all adult age groups and backgrounds and use Lyft to commute to and  
3 from work...spend more time at local businesses and stay out longer knowing they can get a re-  
4 liable ride home...As a result of improved freedom to get around, Lyft riders help stimulate local  
5 economic activity.”

6 - Form S-1 Registration Statement, Filed Lyft IPO document. Securities and Exchange Commis-  
7 sion, Washington, DC, March 1, 2019.

8  
9 “When you take an Uber ride, the vast majority of the funds...actually stay in the city and usually  
10 go from someone who can afford a ride to someone who needs to earn a living so it’s actually...a  
11 pretty strong...driver in terms of money flows in local markets and local cities.”

12 - Dara Khosrowshahi, Chief Executive Officer, Uber. Remarks to Economic Club of New York,  
13 December 4, 2019.

#### 14 **Uber and Lyft claims about employment and wages in unstable jobs or industries**

15 This second collection of quotes, also cited in chronological order, features several of the same  
16 Uber and Lyft leaders who spoke to overall economic benefits of TNCS in the previous list. In  
17 particular, these statements gesture at a particular improvement for workers employed in less sta-  
18 ble jobs, whether temporary, seasonal, transitional, or otherwise benefiting from the flexibility of  
19 driving for TNCs. This informs our second question and hypothesis.

20  
21 “Flexibility is the new stability, and most people aren’t picking one career, one employer...More  
22 people are going after their dreams pursuing, you know, careers as, you know, artists, as musicians,  
23 as entrepreneurs. Lyft provides a phenomenal platform for people whether they’re in between jobs  
24 or pursuing their passion.”

25 - Logan Green, Chief Executive Officer, Lyft. Remarks at TechCrunch Disrupt conference, New  
26 York, May 30, 2015.

27  
28 “In the Uber world you can use your own car, you make more dollars per hour, and it’s flexi-  
29 ble...you don’t have a shift.”

30 - Travis Kalanick, Chief Executive Officer, Uber. The Late Show with Stephen Colbert, New York,  
31 Sep 11, 2015.

32  
33 “Uber is there to make ends meet for those folks who are maybe finding a transition in their life.”

34 - Travis Kalanick, Chief Executive Officer, Uber. Squawk Box CNBC interview New York, April  
35 27, 2016.

36  
37 “Pushing a button, starting work, pushing a button and stopping work. That flexibility in work  
38 is, I think, the real breakthrough.”

39 - Travis Kalanick, Chief Executive Officer, Uber. The Charlie Rose Show, New York, Sep 11, 2017.

40  
41 “The number one reason that our drivers tell us they love driving for us is because they’re their  
42 own boss.”

43 - Dara Khosrowshahi, Chief Executive Officer, Uber. New York Times DealBook lecture, New  
44 York, November 9, 2017.

“Seventy-five percent of the drivers say flexibility is important to them. Most of our drivers are using Uber to fill in the gaps with their other income.”

- Olivia van Nieuwenhuizen, Data Scientist, Uber. Statement in Orange County Register, July 26, 2018.

“It’s a decent living and, more importantly, it’s a very flexible living. You’d be able to drive whatever hours you want.”

- Dara Khosrowshahi, Chief Executive Officer, Uber. Economic Club of Washington DC lecture, June 11, 2019.

“The vast majority of our Uber drivers are actually part-time drivers. Uber is...flexible on earnings ...we have drivers who earn when they want to and, you know, many of them are students. Many of them are retirees. Some of them need a side gig.”

- Dara Khosrowshahi, Chief Executive Officer, Uber. Remarks to Economic Club of New York, December 4, 2019

“There’s going to be much more flexibility both in terms of whether you go to work physically but even if you’re going to work there’s going to be a lot more flexibility about the hours... and that... creates a more healthy marketplace.”

- Dara Khosrowshahi, Chief Executive Officer, Uber. Remarks at Skiff Global Forum, New York, September 28, 2021.

“Look at other, maybe comparable, labor markets. If you look at [the] retail industry, the hospitality-leisure industry, active drivers on Lyft...are coming back five times faster than those industries, so I think a big part of that is the great flexibility we offer.”

- John Zimmer, President and Co-Founder, Lyft. Yahoo Finance interview, November 3, 2021.

## **QUALITATIVE RATIONALE FOR ALTERNATIVE (NON-TWFE) ESTIMATORS**

As documented in the paper’s literature review, the presence of heterogeneous treatment effects can bias estimates from two-way fixed effects regressions when the timing of treatment is staggered. This necessitates a causal inference method that does not use earlier-treated units as controls for later-treated units. In our context, where all cities are ultimately treated during the study period, we use three alternative modified difference-in-difference estimators, all of which support comparing treated and not-yet-treated units. However, it is first necessary to establish the inappropriateness of two-way fixed effects by critically considering the nature of the treatment variables, namely, the arrival of Uber and Lyft in urban areas.

The staggered timing of treatment is self-evident, as both Uber and Lyft entered different cities in different years. The heterogeneity of treatment across metropolitan areas can be strongly inferred based on economic priors and a broad intuitive understanding of how transportation and land use influence economic outcome variables. Given a static or established set of available transport options, cities maintain an initial equilibrium mode share [10]. With a new option introduced, mode split ultimately (but not immediately) readjusts based on attributes and utility of all alternatives. Attendant to mode share are the social and economic systems tied to transport patterns as well as other time-varying city-specific characteristics (e.g. size, density, proportion of mixed-use

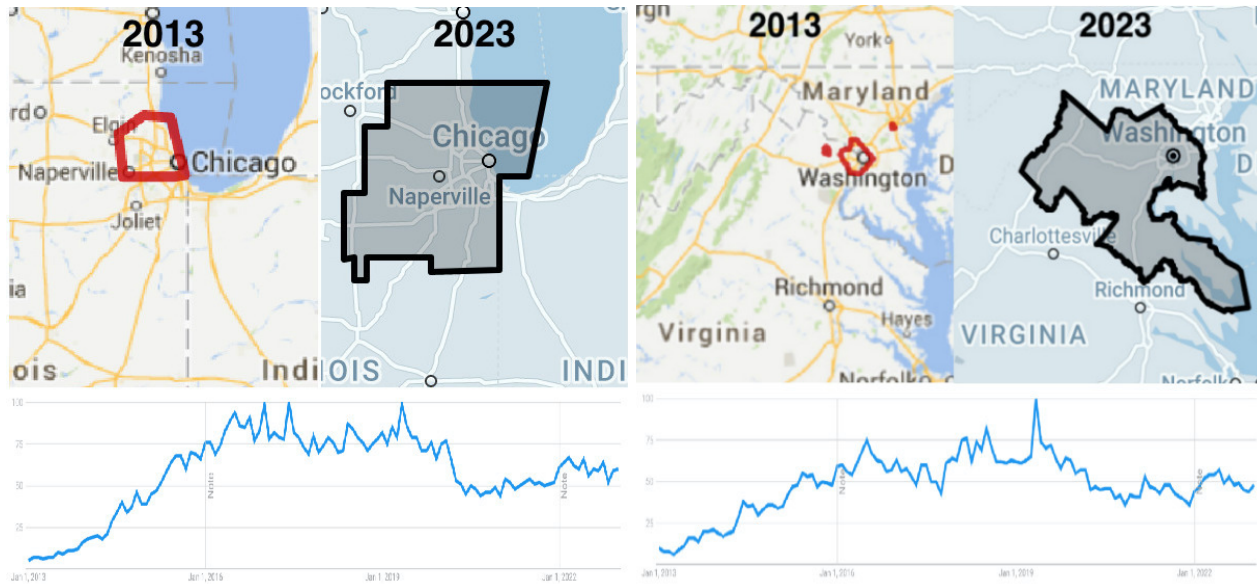

**FIGURE 1:** Uber Service Area Screenshots and “Uber” Google Search History by Region, Chicago (left) and Washington DC (right), 2013-2023. *Sources: Uber and Google.*

1 residential and commercial neighborhoods) that may not be captured in city or year fixed effects  
 2 [7]. In the Callaway Sant’Anna framework, the analogous group- or time-average effects are robust  
 3 to heterogeneity in treatment effects.

4 Also threatening to two-way fixed effects is the presence of dynamic treatment across units.  
 5 Of particular interest here are dynamics that influence the rate of uptake, or the post-treatment  
 6 “ramping up” of Uber and Lyft in the 2010s. There is strong evidence that the growth of TNCs  
 7 varied at different rates and at different timescales across metropolitan areas, as illustrated with  
 8 two representative cities in **Figure 1**.

9 The side-by-side comparison in **Figure 1** of the Washington, DC and Chicago metropoli-  
 10 tan areas, two regions whose initial UberX launches fell earlier in the treatment period, reveals  
 11 the asymmetric and asynchronous expansion that may not be adequately captured in two-way  
 12 fixed effects estimation. The cached screenshots on the left, accessed using a web archive of the  
 13 Uber launch website for each city, represents the coverage area at or immediately following entry.  
 14 The screenshots on the right, at the same geographic scale, display the coverage areas today. In  
 15 Chicago, initial Uber coverage favored the city center and the northwestern suburbs, and expanded  
 16 in all directions. In Washington, DC the initial service area included the District of Columbia,  
 17 subsets of Arlington and Montgomery Counties, and discrete exclaves at Dulles and BWI airports.  
 18 Today, it extends nearly 100 miles in multiple directions. The time series underneath each pair of  
 19 screenshots reflects relative Google search history of the word “Uber” during the same 2013-2023  
 20 time period, normalized by city to a 0-100 scale, and reveals a slightly earlier and more sustained  
 21 search popularity in the Chicago area than in the Washington, DC area. The combined evolution of  
 22 the spatial service area and search engine input history for Uber in these two cities alone, extrap-  
 23 olated to all regions, constitutes powerful evidence of dynamic treatment effects, and justification  
 24 for using alternative estimators.

## 1 GOODMAN-BACON DIAGNOSTIC

2 Goodman-Bacon (2021) provides an accompanying quantitative test of whether two-way fixed  
 3 effects (TWFE) estimation would be problematic [11]. Because the mechanism of bias is incorrect  
 4 substitution of earlier-treated units as controls for later-treated units, the Goodman-Bacon test  
 5 detects the degree of effect heterogeneity by metropolitan area, what proportion of units would be  
 6 incorrectly compared, and, based on the staggered timing of treatment, whether certain units would  
 7 receive higher weights in the traditional two-way fixed effects estimator. **Figure 2** is a scatterplot  
 8 showing representative Goodman-Bacon diagnostic results for all outcome variables across our  
 9 167 cities, illustrating heterogeneity of sign, magnitude, and weight. Each of numerous triangular  
 10 data points represent incorrect comparisons of later- to earlier-treated units, and triangular data  
 11 points further to the right in **Figure 2** reflect constituent 2x2 comparisons weighted more heavily  
 12 than those closer to the vertical axis. The outcome of the Goodman-Bacon diagnostic reinforces  
 13 the need to select one or more alternative estimators to TWFE that is robust to the presence of  
 14 heterogeneity in treatment effects across cities or over time treated. However, for comparison, we  
 15 still include TWFE event studies in **Figure 6**, recognizing their potential bias.

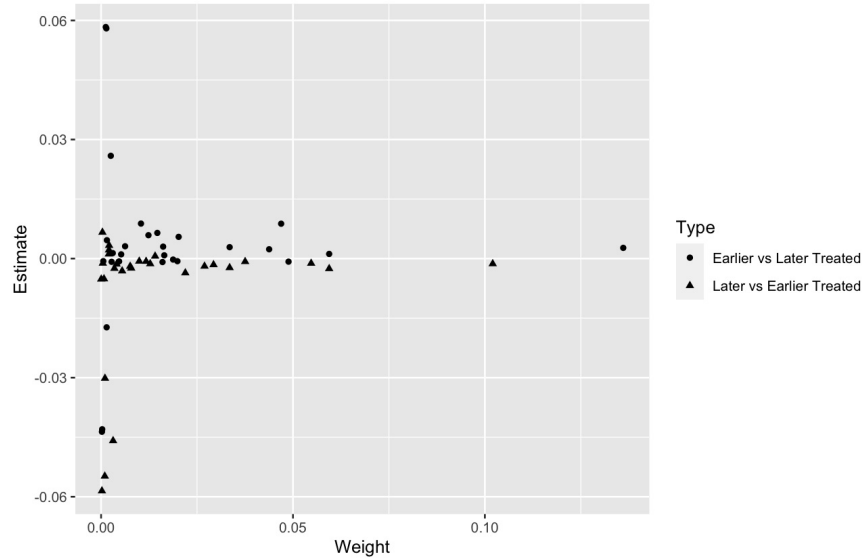

**FIGURE 2:** Average Goodman-Bacon Diagnostic Results, All Variables

## 16 AGGREGATING GROUP-TIME AVERAGE TREATMENT EFFECTS (COHORT, DYNAMIC)

17 The fundamental Callaway and Sant'Anna estimator (presented in the main paper as **Equation 2**  
 18 and replicated below) first generates a set of *group-time average treatment effects on the treated*,  
 19 denoted  $ATT(g, t)$ , for each outcome variable  $Y$  based on cohort  $g$ , and calendar year  $t$ .

$$20 \quad ATT(g, t) = E[Y_{i,t} - Y_{i,g-1} | G_i = g] - E[Y_{i,t} - Y_{i,g-1} | D_{i,t} = 0, G_i \neq g] \quad \forall t \geq g \quad (1)$$

21  
 22  
 23 This initial Callaway and Sant'Anna difference-in-differences output is therefore an array  
 24 of all group-time average treatment effects on the treated in question, each resembling a miniature  
 25 event study for a single TNC entry year  $y$  and subset of cities  $g$  treated in that year. For each launch



1 year cohort and calendar year, an ATT is calculated. In **Equation 2**,  $ATT(g, t)$  is the group-time  
 2 average treatment where, for all  $t \geq g$ ,  $Y$  is the outcome variable,  $t$  is the calendar year,  $g$  is the  
 3 independent variable, the treatment year,  $G_i$  is the cohort year in which city  $i$  was treated, and  $D_{i,t}$   
 4 is an indicator variable denoting whether city  $i$  was treated at or before calendar year  $t$ .

$$5 \quad ATT(g, t) = E[Y_{i,t} - Y_{i,g-1} | G_i = g] - E[Y_{i,t} - Y_{i,g-1} | D_{i,t} = 0, G_i \neq g] \quad \forall t \geq g \quad (2)$$

6  
 7 Synthesizing the collection of group-time ATTs into a single interpretable treatment effect, across  
 8 all cities, requires applying one or more aggregation schemes. The results reported in the paper  
 9 rely on two aggregation techniques directly endorsed in the Callaway and Sant’Anna paper and  
 10 accompanying methodological tutorials [6]. Our overall ATTs reflect aggregation by group, calcu-  
 11 lated using Equation 3, where  $\theta_S^O$  is the overall effect size across all cities in our dataset, there are  
 12 a total of  $T$  time periods,  $g$  and  $G$  are the treatment and cohort years, respectively, and  $\theta_S(g)$  is the  
 13 ATT for each cohort.

$$14 \quad \theta_S^O = \sum_{g=2}^T \theta_S(g) P(G = g) \quad (3)$$

15  
 16 The group aggregation  $\theta_S^O$  expressed in **Equation 3** is, according to Callaway and Sant’Anna, most  
 17 closely analogous to the overall ATT computed in traditional difference-in-differences analyses [5].  
 18 Generating event study analogues from group-time average treatment effects requires a different  
 19 aggregation scheme that represents the average effect for each year relative to treatment, in our  
 20 case UberX or Lyft entry. The treatment effect dynamics  $\theta_D(e)$ , a function of calendar years  $e$   
 21 before or after treatment, is given by **Equation 4**, where, again, there are  $T$  total calendar years,  $g$   
 22 is the treatment year, and  $G$  is the cohort year. In other words, **Equation 4** calculates the average  
 23 treatment effect on treated cities given  $e$  years of TNC exposure.

$$24 \quad \theta_D(e) = \sum_{g=2}^T \mathbf{1}\{g + e \leq T\} ATT(g, g + e) P(g = G | G + e \leq T) \quad (4)$$

25  
 26  
 27 The five event study plots in **Figure 3** of the main paper use a universal base period for reference,  
 28 in which the pre-treatment year  $t = -1$  is set to zero and treatment effects interpreted accordingly.  
 29 While most analogous to TWFE estimation, the Callaway Sant’Anna method also allows for a  
 30 varying base period. This fixes the reference year to  $t = -1$  for treatment and post-treatment  
 31 years, but in the pre-treatment period uses a rolling base simply of the previous year. We include  
 32 this varying base period event study as **Figure 3** as an event study in this SI.

## 1 ADDITIONAL ESTIMATORS (SUN AND ABRAHAM, STACKED REGRESSION)

2 The Sun and Abraham estimator effectively combines Goodman-Bacon decomposition with the  
3 Callaway and Sant’Anna approach [8]. Just as Callaway and Sant’Anna compile and average  
4 across groups by treatment year, the Sun and Abraham method aggregates treatment effects by  
5 cohort  $e$ . In **Equation 5**,  $D_{i,t}^l$  is an indicator variable that is equal to 1 if year  $t$  is  $l$  years before  
6 initial treatment of unit  $i$ ,  $\mathbf{1}\{E_i = e\}$  is a cohort indicator that is equal to 1 for metro areas  $i$  who  
7 are in treatment year cohort  $e$ ,  $\delta_{e,l}$  is a coefficient representing the average treatment effect on the  
8 treated, and  $\gamma_i$  and  $\tau_t$  are unit and calendar year fixed effects [2].

$$9 \quad Y_{i,t} = \gamma_i + \tau_t + \sum_e \sum_{l \neq -1} \delta_{e,l} (\mathbf{1}\{E_i = e\}) \cdot D_{i,t}^l + \varepsilon_{i,t} \quad (5)$$

10  
11 Our third and final estimator relies on stacked regression, drawing on the methods of Cengiz *et al.*  
12 (2019) and implemented manually in R with a script modified from Nguyen (2022) and using pre-  
13 and post-treatment window of  $\pm 4$  years [13]. The primary source of bias in TWFE (**Equation 1**  
14 in the main paper) is unwanted constituent  $2 \times 2$  DiD comparisons that use earlier-treated units  
15 as controls for later-treated ones, and are incorrectly aggregated into the overall treatment effect  
16 estimate [11]. Subsetting and stacking datasets is a form of gatekeeping; the method applies more  
17 restrictive criteria for comparison groups and enables TWFE estimation limited to “clean” con-  
18 trols. However, since treatment effects are identified with ordinary least squares, some OLS biases  
19 spotted by Baker (2021), while mitigated, may persist in ATTs estimated by stacked regression [1].

20 These two additional methods also use not-yet-treated units as controls because all units  
21 receive Uber and Lyft service during the ten-year event domain. We also deploy the same simulta-  
22 neous bootstrap method for unstable employment and unstable earnings, because both are subsets  
23 of total employment and earnings, respectively. Again, we use 5,000 replications and a paired t-test  
24 to confirm these subsets are statistically significantly different from their superset variables [9].

25 In **Table 2** we report the point estimates and 95% confidence intervals for all five variables  
26 and all three alternative difference-in-differences methods cited in Baker (2021) [1], for the entire  
27 event window rather than the  $[-3, +2]$  truncation reported in the main paper. These ranges, and  
28 the particularly high point estimates, must be interpreted with caution given the inclusion of a  
29 small number of much larger cities, treated early and containing data at four, five, and six years  
30 following TNC entry. Unlike the main results, these estimates, as illustrated in the event studies  
31 on the following pages, effectively draw from a panel that is highly unbalanced in event time.

32 Given the bias introduced by the known unbalanced panel behind **Table 2** results, we can-  
33 not reliably interpret these as effect sizes, nor can we necessarily extrapolate from the narrower  
34 event window to a wider one. The magnitudes and uncertainties in the main paper represent a  
35 more appropriately conservative subset of the years and cities. However, we note that all three  
36 estimators in **Table 2** use markedly different techniques yet return very similar signs, magnitudes,  
37 and statistical significances to one another, for all variables in this unbalanced event time domain.

## 38 EVENT STUDIES FOR ADDITIONAL ESTIMATORS

39 As described in its caption, the event study plots (**Figures 3 - 5**) in the main paper reflect dynamic  
40 group-time average treatment effects, aggregated using the Callaway and Sant’Anna method docu-  
41 mented in **Equation 4** with a universal base period of  $t = -1$ . **Figure 3** instead uses the prior year  
42 as a reference period before treatment, and year  $t = -1$  as a fixed reference year after treatment.  
43 These display similar enough effect sizes and error bars to indicate robustness to base year.

**TABLE 2:** Average Treatment Effects on the Treated, Full Event Time Window

| <b>Outcome Variable</b>                              | <b>Modified DiD Method</b>                                  | <b>Point Estimate</b>               | <b>95% CI (Low)</b>          | <b>95% CI (High)</b>       |
|------------------------------------------------------|-------------------------------------------------------------|-------------------------------------|------------------------------|----------------------------|
| Log Total Employment per Working Age Population      | Callaway & Sant'Anna<br>Sun & Abraham<br>Stacked Regression | 0.0295***<br>0.0340***<br>0.0371*** | 0.0023<br>0.0232<br>0.0238   | 0.0567<br>0.0448<br>0.0504 |
| Log Unstable Employment per Working Age Population   | Callaway & Sant'Anna<br>Sun & Abraham<br>Stacked Regression | 0.0677***<br>0.0789***<br>0.0966*** | 0.0238<br>0.0564<br>0.0754   | 0.1115<br>0.1014<br>0.1178 |
| Log Total Earnings per Working Age Population        | Callaway & Sant'Anna<br>Sun & Abraham<br>Stacked Regression | 0.0337<br>0.0278***<br>0.0182       | -0.0042<br>0.0086<br>-0.0012 | 0.0716<br>0.0470<br>0.0376 |
| Log Unstable Earnings per Working Age Population     | Callaway & Sant'Anna<br>Sun & Abraham<br>Stacked Regression | 0.0611***<br>0.0615***<br>0.0624*** | 0.0021<br>0.0052<br>0.0242   | 0.1201<br>0.1178<br>0.1006 |
| Log Metropolitan or Micropolitan Area GDP per Capita | Callaway & Sant'Anna<br>Sun & Abraham<br>Stacked Regression | 0.0536***<br>0.0678***<br>0.0607*** | 0.0211<br>0.0239<br>0.0405   | 0.0861<br>0.1117<br>0.0809 |

The event studies in **Figures 4** and **5** correspond to the other two estimators whose ATTs are reported in **Table 2**: Sun & Abraham and stacked regression, respectively. In addition, we provide a set of event studies, using two-way fixed effects, for all variables in **Figure 6**, which we report alongside the major caveats noted earlier in this SI and in the main paper methods section: in particular, staggered treatment timings with heterogeneous and dynamic effects.

Just as a broadly similar pattern of magnitude and statistical significance was evident in ATTs for each outcome variable across all estimators (Table 1 in the paper), the same is largely true in the Sun & Abraham and stacked regression event studies, with no statistical significance during or before the launch year, and positive and a statistically significant treatment effect measured for all five variables by the fourth year after UberX or Lyft entry. The years in gray, like in the main paper event studies, should be interpreted with greater caution and with particular attention to the percentage of metropolitan areas represented in that year relative to treatment.

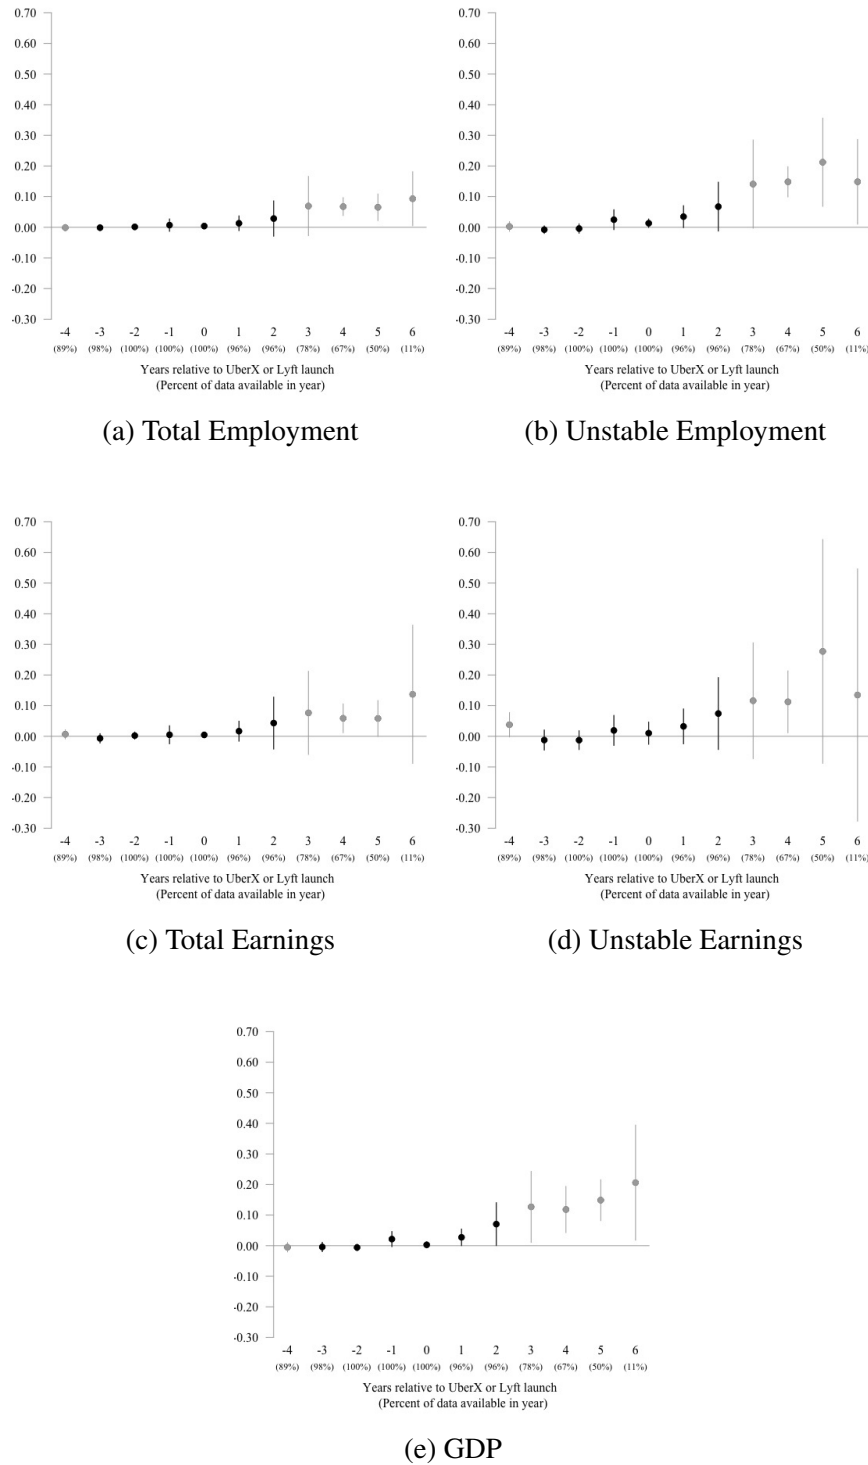

**FIGURE 3:** Callaway & Sant’Anna *varying base period* event study results for average treatment effects, by year, for (a) total employment, (b) unstable employment, (c) total earnings, (d) unstable earnings, and (e) GDP. All variables are normalized by population (total or working-age) and log transformed. Only pre-treatment estimates and errors depend on base year. All post-treatment point estimates and confidence intervals are identical to those in **Figure 3** of the main paper. Estimates are shown in gray for years with limited data availability outside the  $[-3, +2]$  event time window.

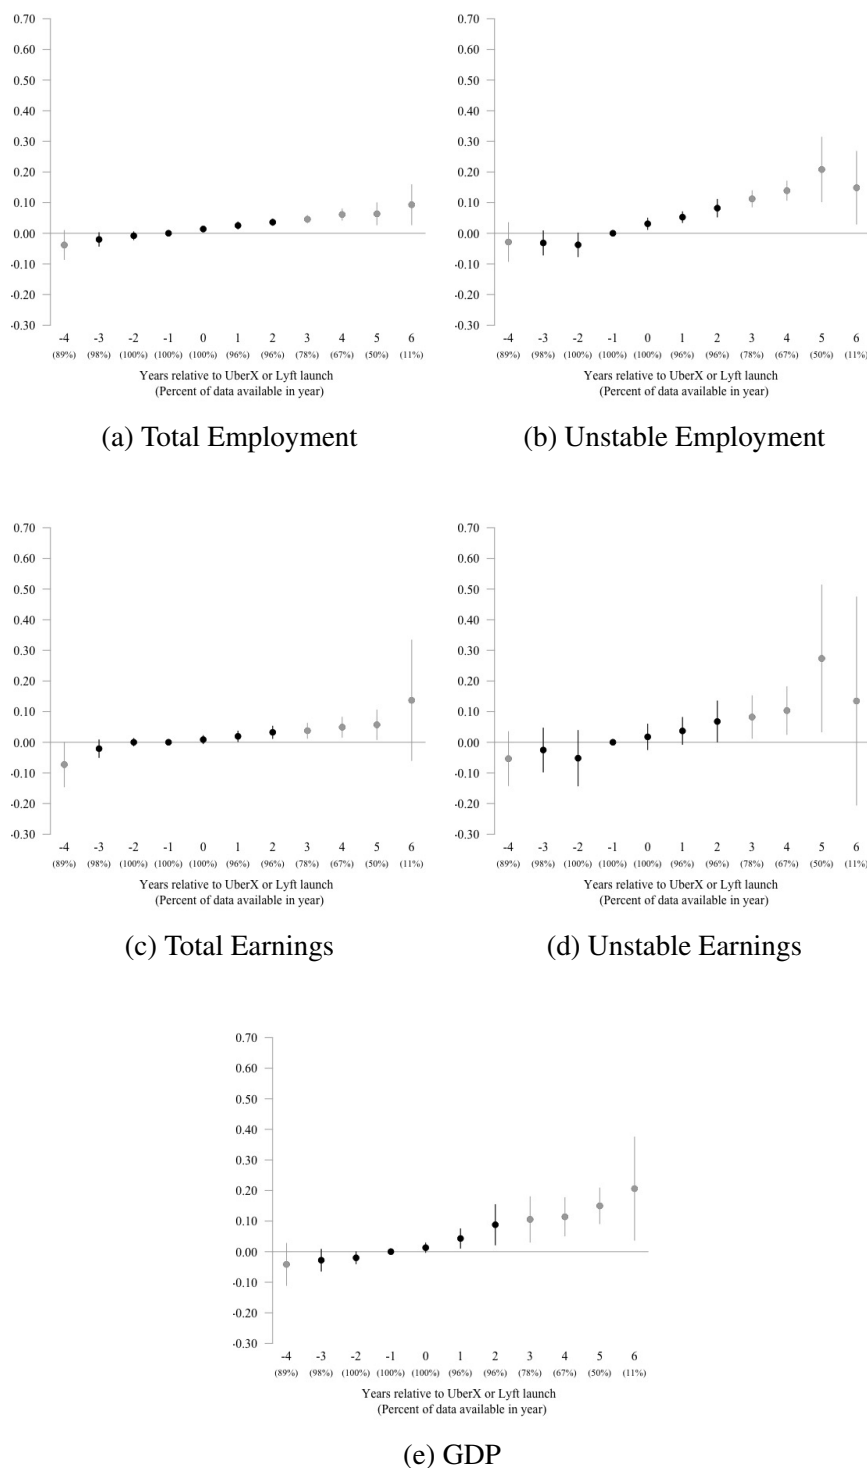

**FIGURE 4:** Sun & Abraham event study results for average treatment effects, by year, for (a) total employment, (b) unstable employment, (c) total earnings, (d) unstable earnings, and (e) GDP. All variables are normalized by population (total or working-age) and log transformed. Estimates are shown in gray for years with limited data availability outside the  $[-3, +2]$  event time window.

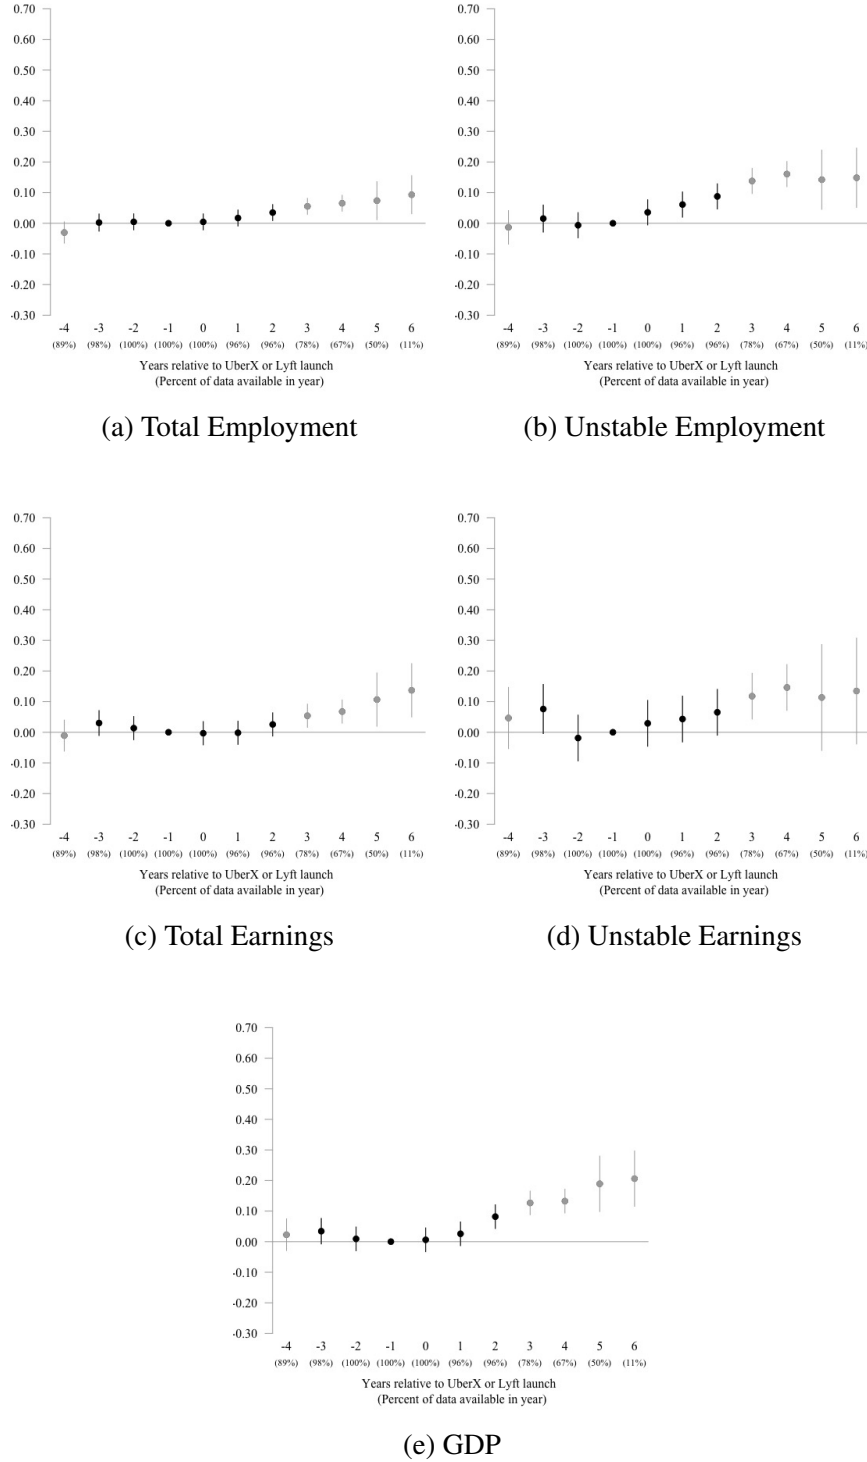

**FIGURE 5:** Stacked regression event study results for average treatment effects, by year, for (a) total employment, (b) unstable employment, (c) total earnings, (d) unstable earnings, and (e) GDP. All variables are normalized by population (total or working-age) and log transformed. Estimates are shown in gray for years with limited data availability outside the  $[-3, +2]$  event time window.

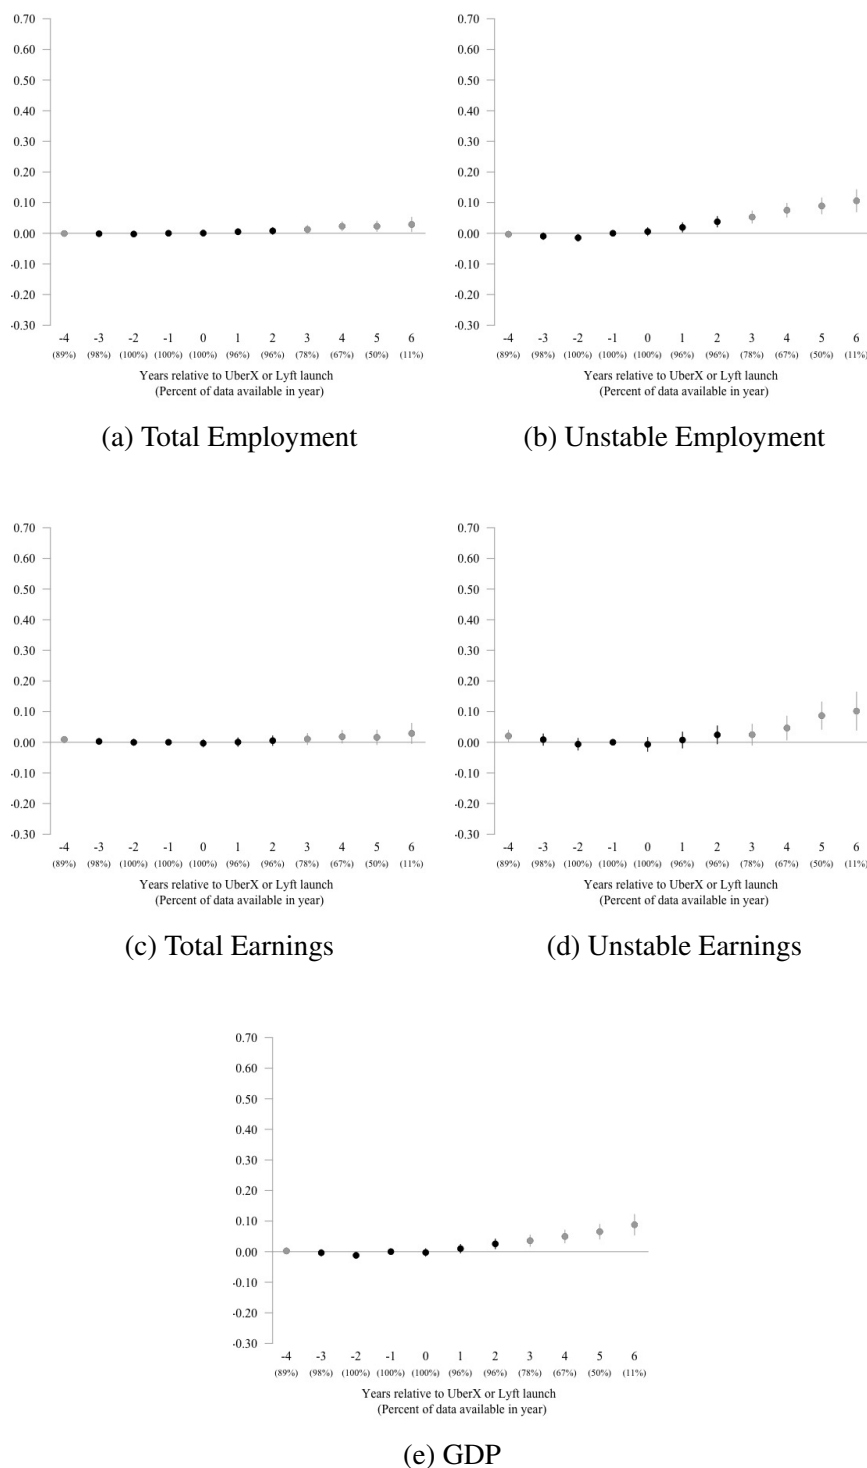

**FIGURE 6:** Two-way fixed effects event study results for average treatment effects, by year, for (a) total employment, (b) unstable employment, (c) total earnings, (d) unstable earnings, and (e) GDP. All variables are normalized by population (total or working-age) and log transformed. Estimates are shown in gray for years with limited data availability outside the  $[-3, +2]$  event time window.

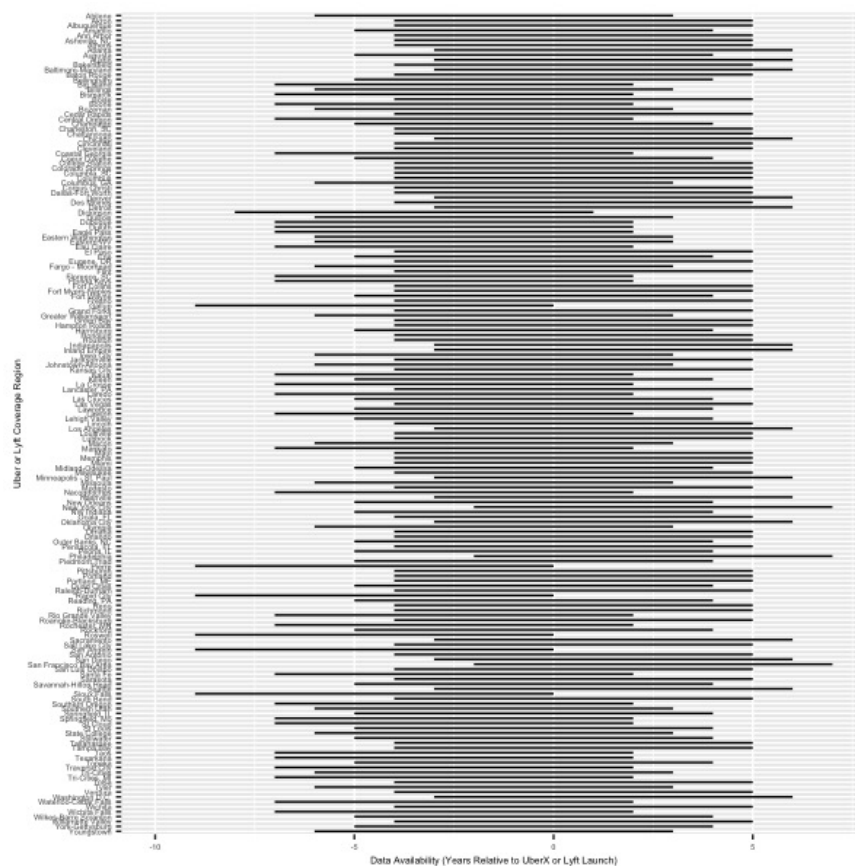

**FIGURE 7:** Data availability by MSA and year before or after launch

## 1 DATA AVAILABILITY AND EXTENDED EVENT STUDIES

2 All estimates and error bars are in gray outside the previously mentioned  $[-3, +2]$  window, based  
 3 on the data availability illustrated in the main paper histogram (**Figure 2**) and in **Figure 7** above.  
 4 There are visibly sharp reductions in data availability in the fourth years before and after UberX or  
 5 Lyft launch, and **Figure 7** shows all years of availability at the individual metropolitan area level.

## 6 IDENTIFICATION ASSUMPTIONS

7 We develop and examine a composite list of assumptions under which the methods that we use  
 8 produce unbiased causal inference estimates, using Callaway and Sant’Anna (2021) as a template,  
 9 made explicitly or implicitly across the three seminal papers for each respective alternative estima-  
 10 tor. We then consider these assumptions in context of the 2010-2019 TNC dataset and comment  
 11 on how satisfactorily our three models ostensibly meet the necessary prerequisites. As certain  
 12 assumptions appear more sound than others for our underlying data, this section cumulatively in-  
 13 troduces caveats to interpreting our final results. Beyond the assumptions identified in Callaway  
 14 and Sant’Anna (2021), we discuss one additional possible challenge to identification.



# 1 **Callaway & Sant’Anna Assumptions**

## 2 *Irreversibility of treatment*

3 The assumption of irreversibility of treatment requires that once a unit is treated it stays treated  
 4 in all future time periods. This holds in our data with one exception: Uber and Lyft were briefly  
 5 banned in Austin, TX from May 2016 to May 2017. During this time an alternative TNC service,  
 6 RideAustin, continued to operate. The time period of our analysis is the calendar year, and we  
 7 observe no calendar years without treatment.

## 8 *Random sampling*

9  $\{Y_{i,1}, Y_{i,2}, \dots, Y_{i,\tau}, X_i, D_{i,1}, D_{i,2}, \dots, D_{i,\tau}\}_{i=1}^n$  is independently and identically distributed, where  $\tau$  is  
 10 the last time period,  $Y_{i,t}$  are the potential outcomes, and  $D_{i,t}$  are the treatment indicators. Intuitively,  
 11 this assumption states that the sampling of units is not a function of the path of treatment status.  
 12 In our case, we did not dictate which cities entered our sample on the basis of whether or when  
 13 Uber and Lyft entered the city (i.e., we include all cities for which we have data on the relevant  
 14 outcomes). This assumption also implies that the treatment status of one unit does not affect the  
 15 outcome of another unit (no spillover). While availability of TNCs in other cities could plausibly  
 16 affect travel between cities, we do not expect treatment of one city to meaningfully affect economic  
 17 outcomes in other cities.

## 18 *Limited treatment anticipation*

19 The assumption of limited treatment anticipation requires that treated groups do not anticipate and  
 20 respond to treatment more than  $n$  years in advance. The Sun & Abraham method imposes a stricter  
 21 assumption of no anticipation. Given the limited service regions during early launch and the speed  
 22 and secrecy of launch decisions, we would not expect regional markets to anticipate TNC entry in  
 23 a way that would affect the indicators that we measure, and the absence of statistically significant  
 24 pre-treatment effects for any estimator provides evidence consistent with this assumption.

## 25 *Conditional parallel trends*

26 The assumption of conditional parallel trends based on not-yet treated groups requires that, after  
 27 conditioning on any covariates, the differences between treated and control groups in pre-treatment  
 28 periods hold constant over time. Our event studies reveal no statistically significant pre-treatment  
 29 effects for any variables or methods, which is consistent with parallel trends.

## 30 *Overlap*

31 The assumption of overlap requires that the propensity of each unit to be treated is bounded away  
 32 from 0 and 1, meaning there are no systematic processes that would guarantee or prohibit a unit  
 33 from being treated. We are not aware of any such systematic factors. Although policy restricted  
 34 operation of Uber and Lyft in Austin, TX from May 2016 to May 2017, the policy itself changed  
 35 over time, and all units had the potential to be treated or not treated.

## 36 **Correlated entry of other gig economy platforms**

37 Finally, we must consider that TNC entry timing could be correlated with entry of other smartphone-  
 38 based gig economy platforms, such as Airbnb, Grubhub, TaskRabbit, or other electronically-  
 39 mediated services. While there are varying definitions of the scope of the gig economy and how to  
 40 measure a particular industry’s market share, TNCs were estimated in 2018 to comprise roughly

1 half of app-based economy activity and revenue in the United States [12]. Importantly, like most  
2 United States labor data, the QWI variables may not account for Uber and Lyft drivers consistently  
3 across cities or comprehensively within them. The core indicators used (beginning-of-quarter and  
4 stable employment and earnings) exclude certain highly unstable jobs and individuals who are not  
5 employed at either boundary between quarters.

6 If TNCs systematically launched in similar regions at similar times as other key players in  
7 the peer-to-peer app-facilitated economy, then our estimates may capture effects attributable to a  
8 combination of TNCs and other concurrent entry effects [3] (If TNCs launched at different times  
9 than other key players, then treatment effects of these other players could potentially violate the  
10 parallel trends assumption, though our results are all consistent with the parallel trends assump-  
11 tion). Compared to the more readily available spatial and temporal resolution of TNC entry data,  
12 we could not find systematic nationwide data on launch years or market penetration for these other  
13 services to assess the degree of correlation. Beyond the confounding risks from simultaneous entry  
14 and growth, gig platforms may further interact with and complement one another. In Austin, for  
15 example, joint Uber and Airbnb economic effects were estimated to be greater than the sum of  
16 each service alone [4].

## References

- [1] A Baker, D Larcker, and C Wang. *How much should we trust staggered difference-in-differences estimates*. Harvard Business School. 2021.
- [2] Andrew C Baker, David F Larcker, and Charles CY Wang. “How much should we trust staggered difference-in-differences estimates?” In: *Journal of Financial Economics* 144.2 (2022), pp. 370–395.
- [3] Andrew T Bond. “An app for that: Local governments and the rise of the sharing economy”. In: *Notre Dame L. Rev. Online* 90 (2014), p. 77.
- [4] Gordon Burtch, Seth Carnahan, and Brad N Greenwood. “Can you gig it? An empirical examination of the gig economy and entrepreneurial activity”. In: *Management Science* 64.12 (2018), pp. 5497–5520.
- [5] B Callaway and PHC Sant’Anna. *Introduction to DiD with Multiple Time Periods*. 2022.
- [6] Brantly Callaway and P Sant’Anna. *Getting started with the did package*. 2021.
- [7] Robert Cervero. “Built environments and mode choice: toward a normative framework”. In: *Transportation Research Part D: Transport and Environment* 7.4 (2002), pp. 265–284.
- [8] Scott Cunningham. Presentation by Scott Cunningham at CodeChella 2021 on Sun and Abraham estimator. Aug. 2021.
- [9] Daniel J Eck. “Bootstrapping for multivariate linear regression models”. In: *Statistics & Probability Letters* 134 (2018), pp. 141–149.
- [10] Feras El Zarwi, Akshay Vij, and Joan L Walker. “A discrete choice framework for modeling and forecasting the adoption and diffusion of new transportation services”. In: *Transportation Research Part C: Emerging Technologies* 79 (2017), pp. 207–223.
- [11] Andrew Goodman-Bacon. “Difference-in-differences with variation in treatment timing”. In: *Journal of Econometrics* 225.2 (2021), pp. 254–277.
- [12] Lawrence Mishel. *Uber and the labor market: Uber drivers’ compensation, wages, and the scale of Uber and the gig economy*. 2018.
- [13] Mike Nguyen. *A Guide on Data Analysis*. Bookdown, 2022.
